# Supplementary material for: Unveiling the Neuroprotective Mechanisms of Centella Asiatica Extract Delivered via pEG Nanoparticles in TNF-α-Induced Cognitive Decline: An In Vivo Study
Source: Research Square preprint supplement (doi:10.21203/rs.3.rs-5987342/v1), 2025-02-13
Supplement: Supplementary file 1 [file 03dbee3cc2d08e645d541322.docx]

| **Groups** | | **Mice weight (in grams)** | | | | | | | | | | | | | | | | |
| --- | --- | --- | --- | --- | --- | --- | --- | --- | --- | --- | --- | --- | --- | --- | --- | --- | --- | --- |
| **1** | **2** | **3** | **4** | **5** | **6** | **7** | **8** | **9** | **10** | **11** | **12** | **13** | **14** | **15** | **16** | **17** |
| **Male mice** | |  |  |  |  |  |  |  |  |  |  |  |  |  |  |  |  |  |
| **Control** | **1** | 33.3 | 33.7 | 33.9 | 34.7 | 34.9 | 35.5 | 35.8 | 36.3 | 36.5 | 36.6 | 36.7 | 36.8 | 36.8 | 36.6 | 36.7 | 36.6 | 36.7 |
| **2** | 35.7 | 36.1 | 36.5 | 37.2 | 37.7 | 38.2 | 38.6 | 38.8 | 38.9 | 39.1 | 38.3 | 39.2 | 38.8 | 39.1 | 39.3 | 39.9 | 40.6 |
| **3** | 34.7 | 35.5 | 36.1 | 36.9 | 37.2 | 37.5 | 37.6 | 37.6 | 37.8 | 37.8 | 38.1 | 38.3 | 38.2 | 37.9 | 38.4 | 38.5 | 38.3 |
| **4** | 37.1 | 38.2 | 30.1 | 31.7 | 32.1 | 32.9 | 33.1 | 33.4 | 33.5 | 33.5 | 33.3 | 33.5 | 33.7 | 33.5 | 33.3 | 33.8 | 33.4 |
| **5** | 35.1 | 34.6 | 34.5 | 34.6 | 34.5 | 34.5 | 34.7 | 34.9 | 35.2 | 35.5 | 35.7 | 35.6 | 35.5 | 35.2 | 35.7 | 35.9 | 36.3 |
| **Group**  **1: 1** | **1** | 30.8 | 31.3 | 31.8 | 32.1 | 32.4 | 32.7 | 32.9 | 33.2 | 33.5 | 33.7 | 33.4 | 33.8 | 34.3 | 34.7 | 34.3 | 34.4 | 34.9 |
| **2** | 36 | 36.5 | 37.2 | 37.7 | 38.4 | 38.7 | 38.9 | 39.1 | 39.3 | 39.4 | 39.8 | 39.6 | 40.3 | 40.5 | 40.98 | 41.1 | 41.35 |
| **3** | 30.2 | 30.8 | 31.2 | 31.6 | 31.9 | 32.3 | 32.5 | 32.7 | 32.9 | 33.2 | 33.7 | 34.5 | 35.9 | 36.5 | 36.9 | 37.3 | 37.43 |
| **4** | 30.7 | 31.1 | 31.7 | 31.9 | 32.3 | 32.6 | 32.8 | 32.9 | 33.1 | 33.2 | 33.2 | 33.4 | 33.5 | 33.9 | 34.3 | 34.55 | 34.7 |
| **5** | 30.1 | 31.7 | 31.4 | 32.6 | 30.7 | 30.6 | 30.8 | 31.2 | 31.1 | 31.2 | 31.3 | 31.5 | 32.3 | 32.47 | 32.8 | 33.1 | 33.3 |
| **Group**  **1: 100** | **1** | 29.9 | 30.6 | 31.4 | 31.7 | 32.4 | 32.6 | 32.7 | 32.9 | 33.2 | 33.6 | 33.7 | 33.6 | 33.8 | 33.9 | 34.1 | 34.2 | 34.35 |
| **2** | 28.7 | 29.5 | 30.29 | 31.3 | 31.7 | 32.1 | 32.3 | 32.7 | 32.8 | 33 | 32.5 | 32.7 | 32.6 | 32.7 | 32.8 | 32.7 | 32.85 |
| **3** | 37.7 | 38.1 | 38.5 | 39.1 | 39.7 | 39.8 | 40.1 | 39.7 | 39.8 | 40 | 39.9 | 39.8 | 39.7 | 39.9 | 40.1 | 40 | 40.28 |
| **4** | 36.6 | 36.6 | 36.6 | 36.6 | 35.6 | 35.8 | 36.1 | 36.3 | 36.1 | 36.6 | 36.7 | 36.9 | 36.9 | 37.1 | 37.5 | 37.7 | 37.57 |
| **5** | 35.7 | 35.7 | 35.7 | 35.7 | 34.3 | 34.5 | 34.7 | 35.1 | 35.2 | 35.7 | 35.6 | 36.3 | 36.8 | 36.8 | 36.9 | 37.1 | 36.94 |
| **Group 100: 1** | **1** | 32.2 | 32.8 | 33.13 | 33.4 | 33.7 | 34.2 | 34.5 | 34.6 | 35.1 | 35.4 | 35.1 | 35.3 | 35.5 | 35.2 | 35.2 | 35.3 | 35.4 |
| **2** | 32.4 | 32.7 | 32.6 | 32.8 | 33.1 | 33.6 | 33.9 | 34.2 | 34.7 | 34.9 | 34.5 | 34.7 | 34.9 | 35.1 | 35.7 | 36.3 | 36.6 |
| **3** | 34.2 | 34.7 | 35.1 | 35.6 | 36.1 | 36.8 | 37.1 | 36.9 | 37.7 | 38.4 | 37.7 | 37.8 | 38.1 | 37.9 | 37.7 | 37.5 | 37.4 |
| **4** | 32.3 | 32.6 | 32.7 | 33.3 | 33.5 | 33.7 | 33.9 | 34.2 | 34.6 | 34.7 | 34.2 | 35.3 | 35.8 | 36.3 | 36.7 | 36.9 | 37.13 |
| **5** | 31.3 | 31.6 | 32.3 | 32.5 | 32.8 | 33.1 | 33.6 | 34.1 | 35.3 | 35.5 | 34.5 | 34.7 | 34.9 | 35.2 | 35.4 | 35.5 | 35.45 |
