# Supplementary material for: Unveiling the Neuroprotective Mechanisms of Centella Asiatica Extract Delivered via pEG Nanoparticles in TNF-α-Induced Cognitive Decline: An In Vivo Study
Source: Research Square preprint supplement (doi:10.21203/rs.3.rs-5987342/v1), 2025-02-13
Supplement: Supplementary file 2 [file fdece4af1406746f50f7b09b.docx]

**Histology Imaging of the Brain**

| Groups | No | Image |
| --- | --- | --- |
| Control | 1 | 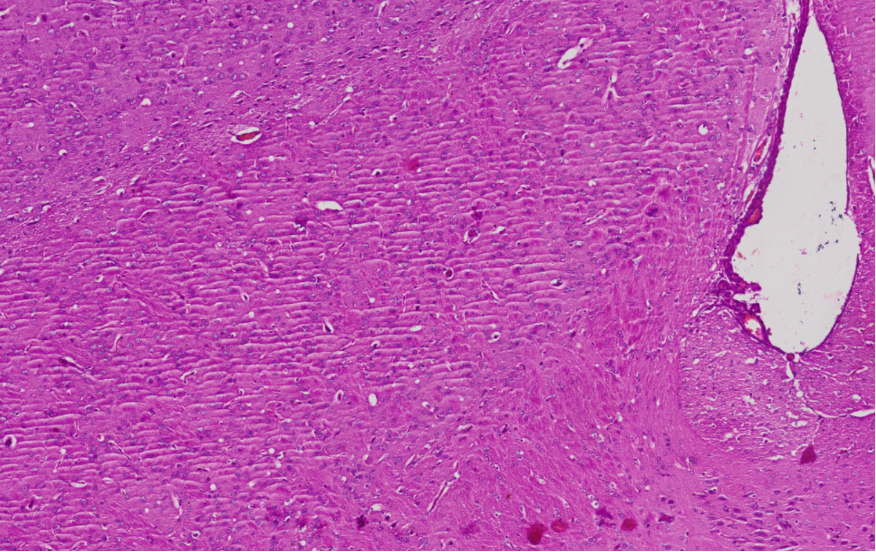 |
|  | 2 | 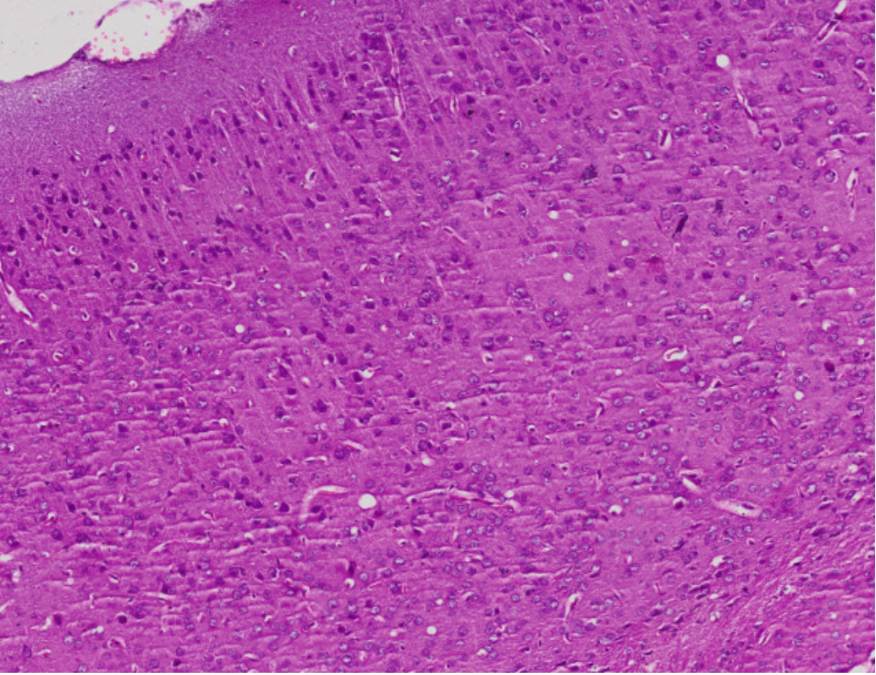 |
|  | 3 | 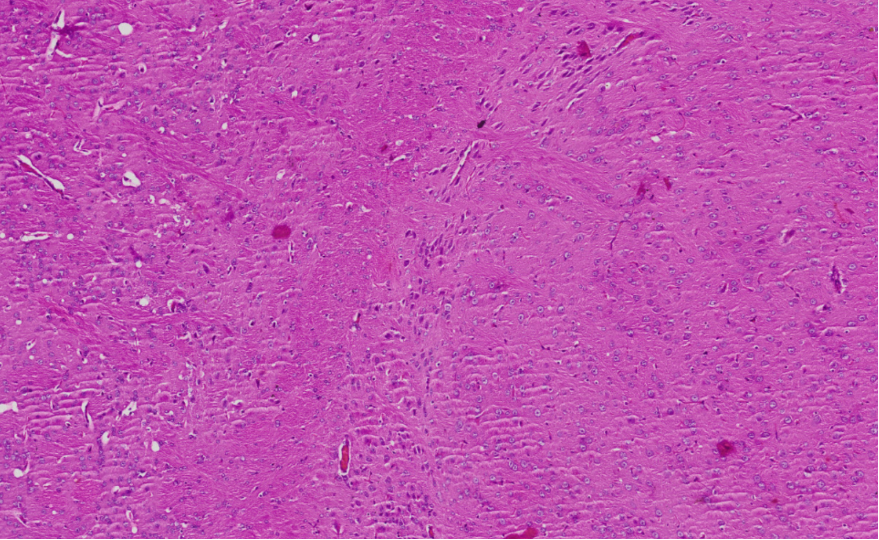 |
|  | 4 | 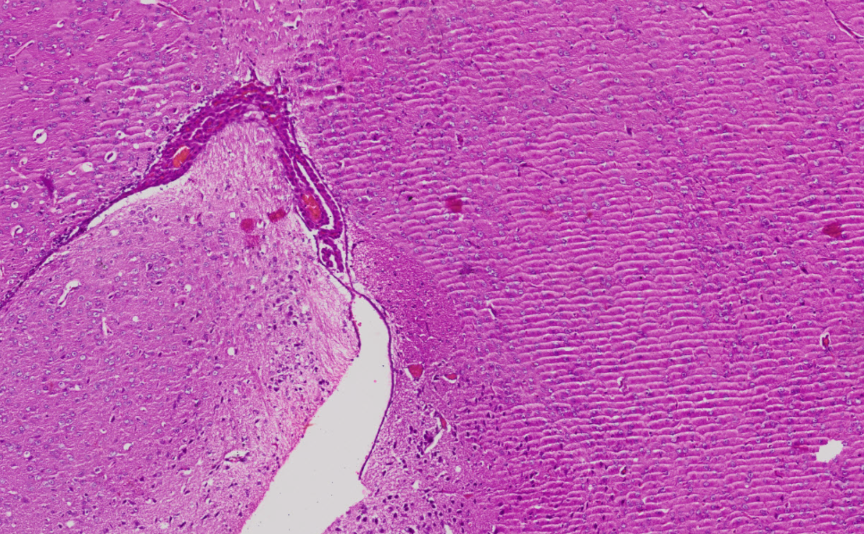 |
|  | 5 | 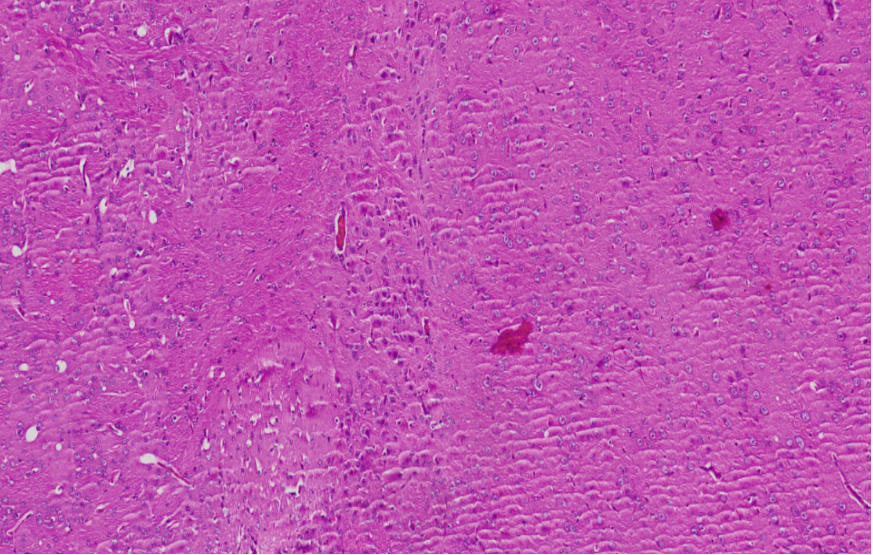 |
| Dose 1:1 | 1 | 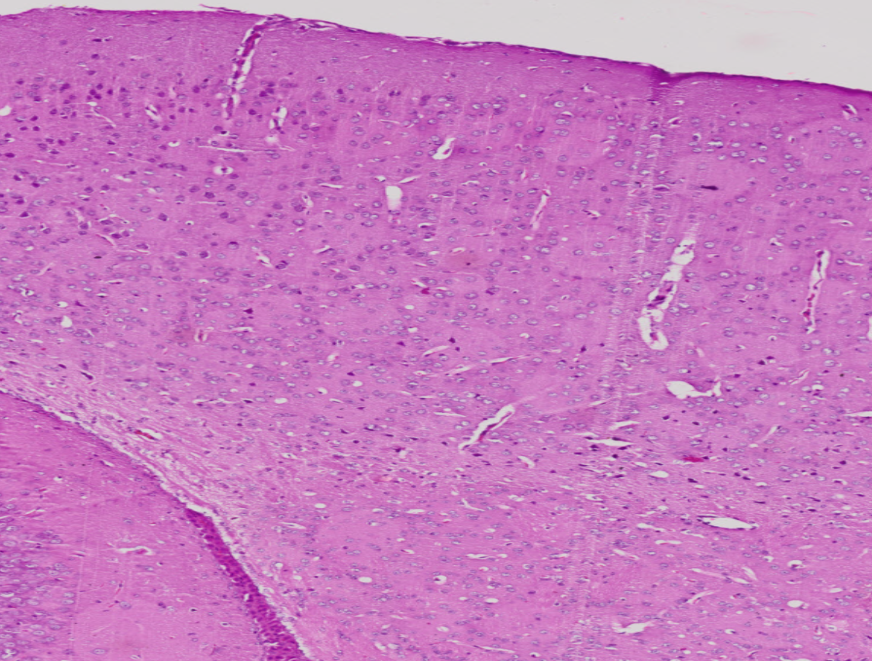 |
|  | 2 | 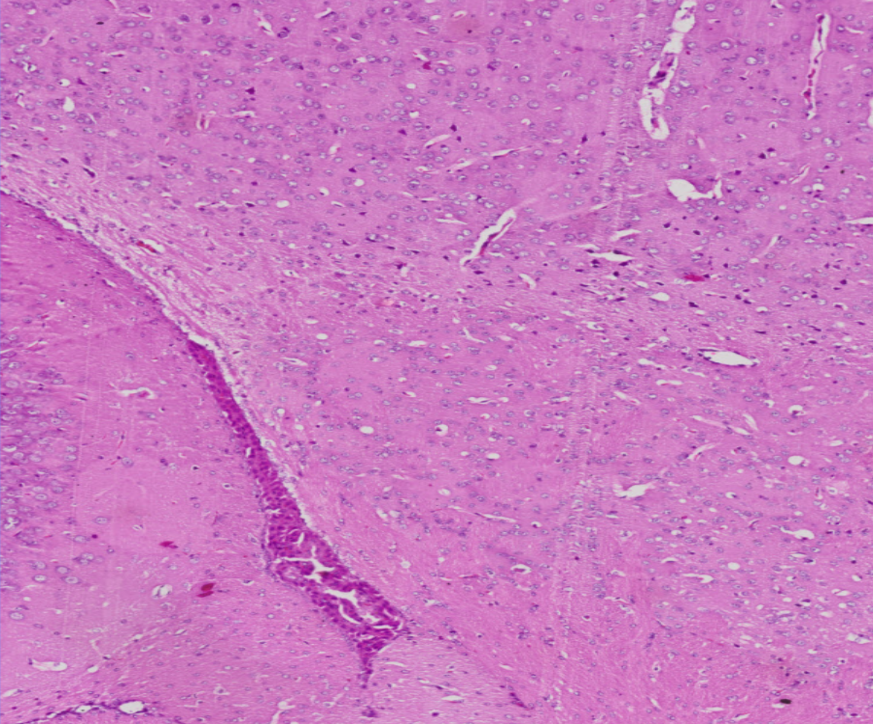 |
|  | 3 | 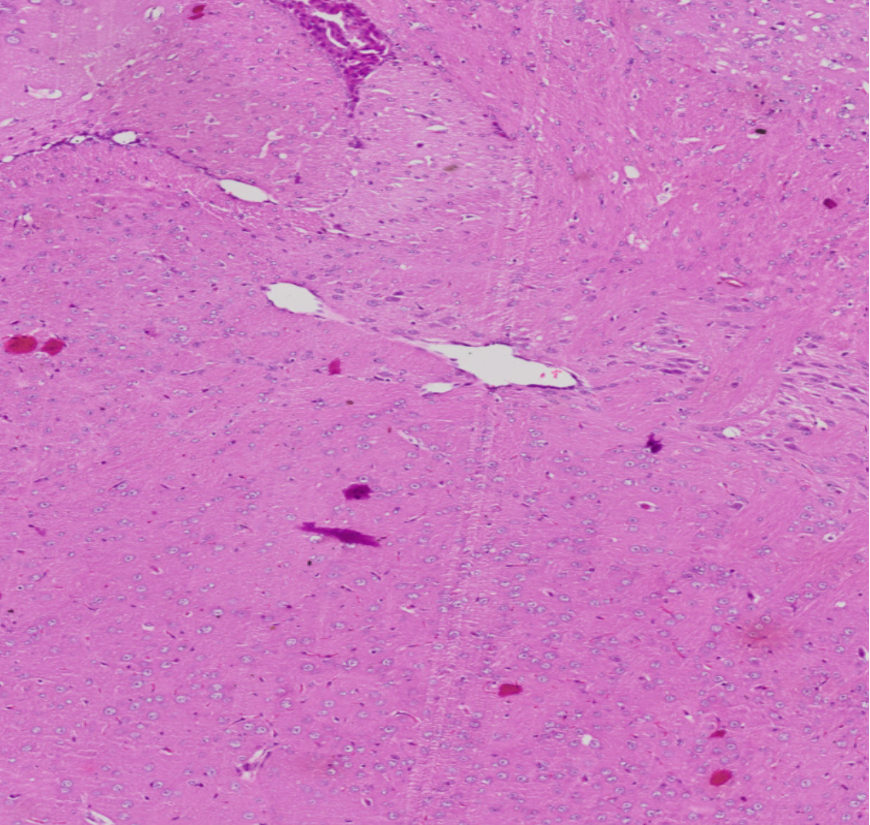 |
|  | 4 | 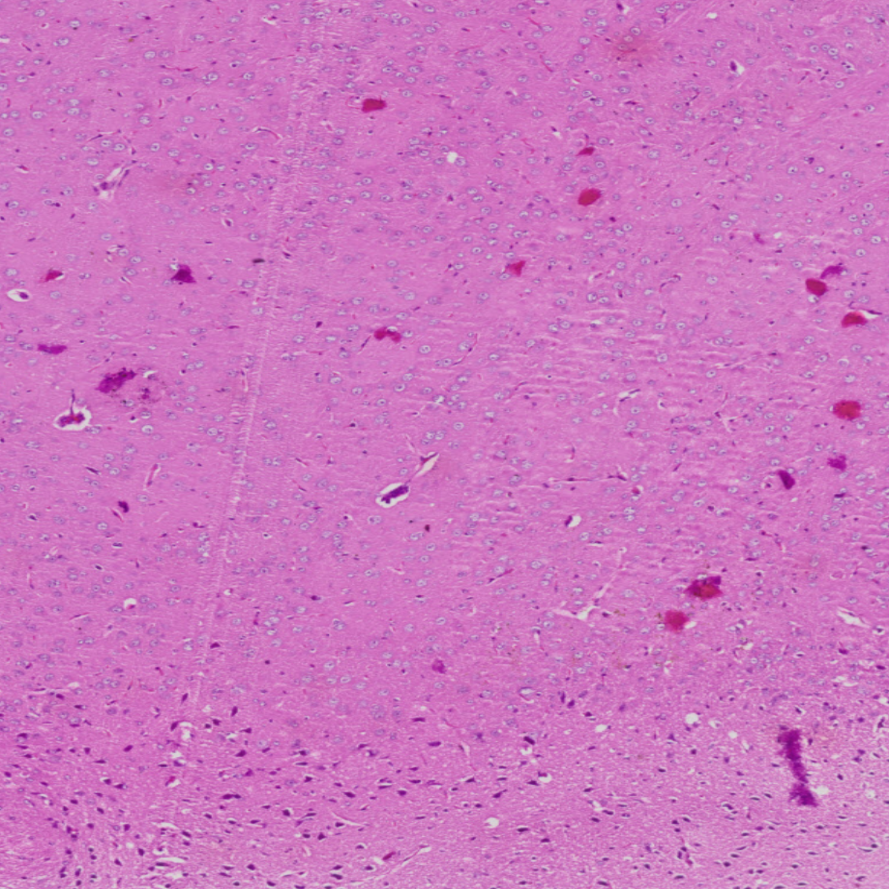 |
|  | 5 | 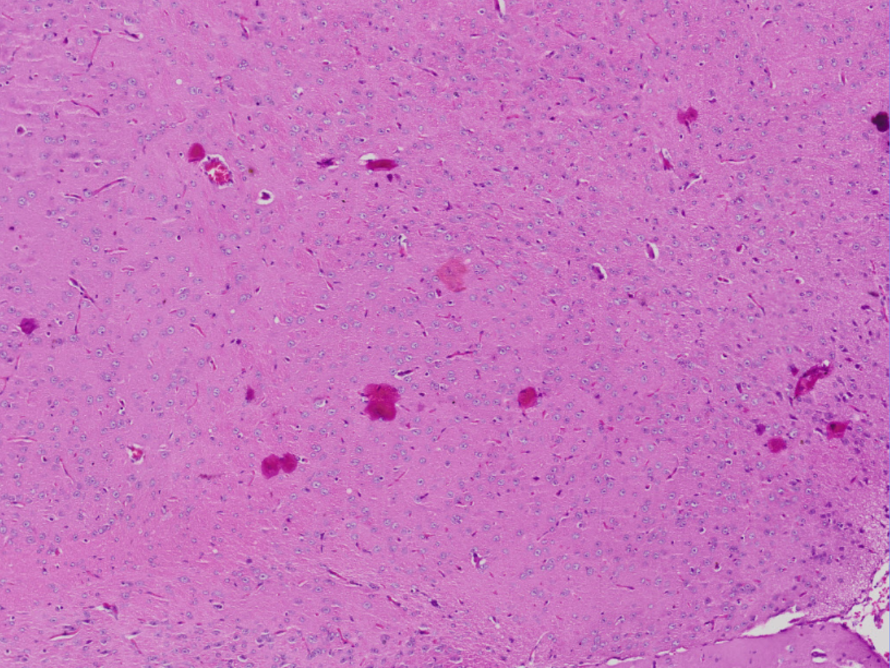 |
| Dose 1:100 | 1 | 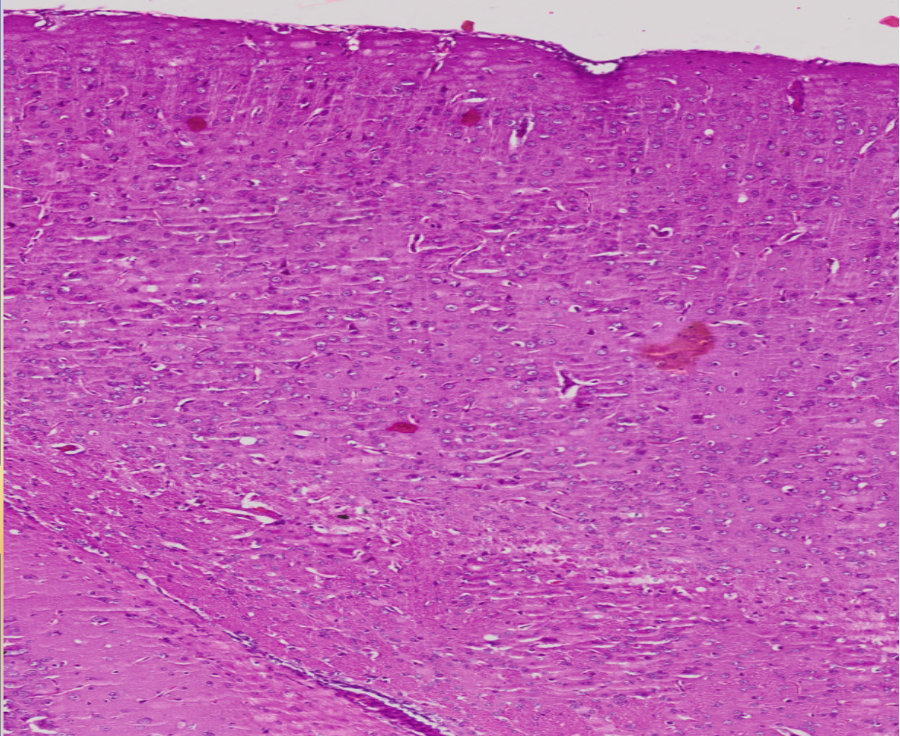 |
|  | 2 | 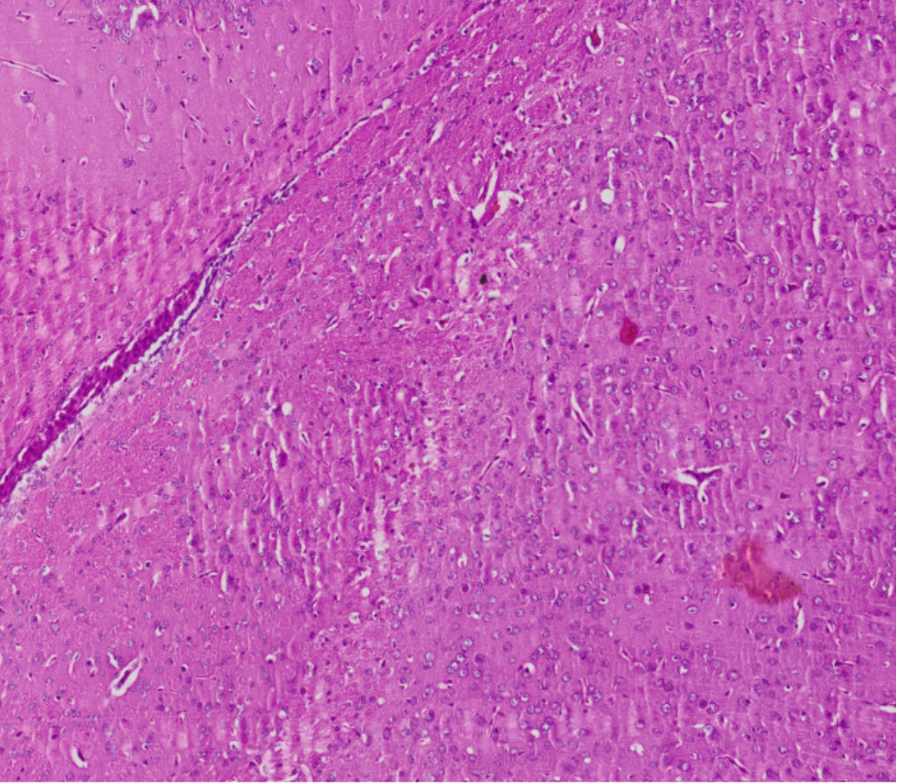 |
|  | 3 | 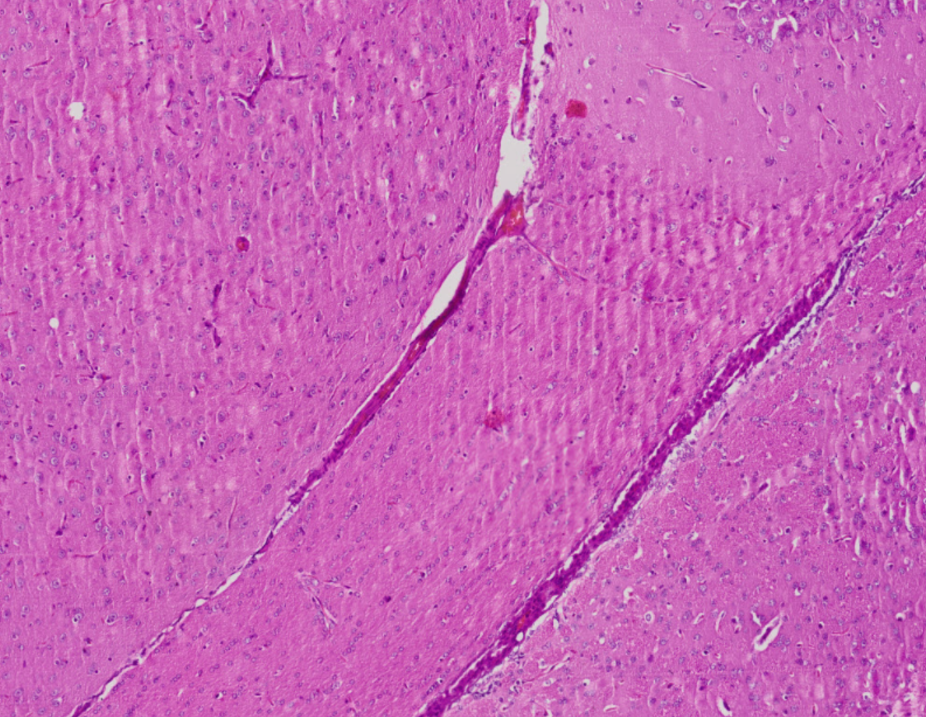 |
|  | 4 | 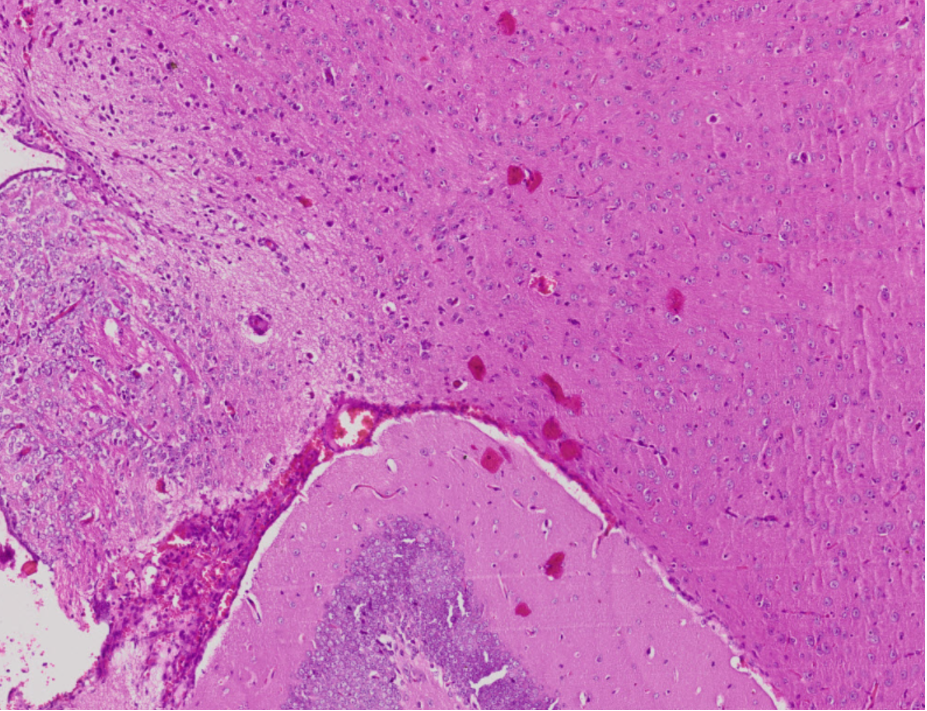 |
|  | 5 | 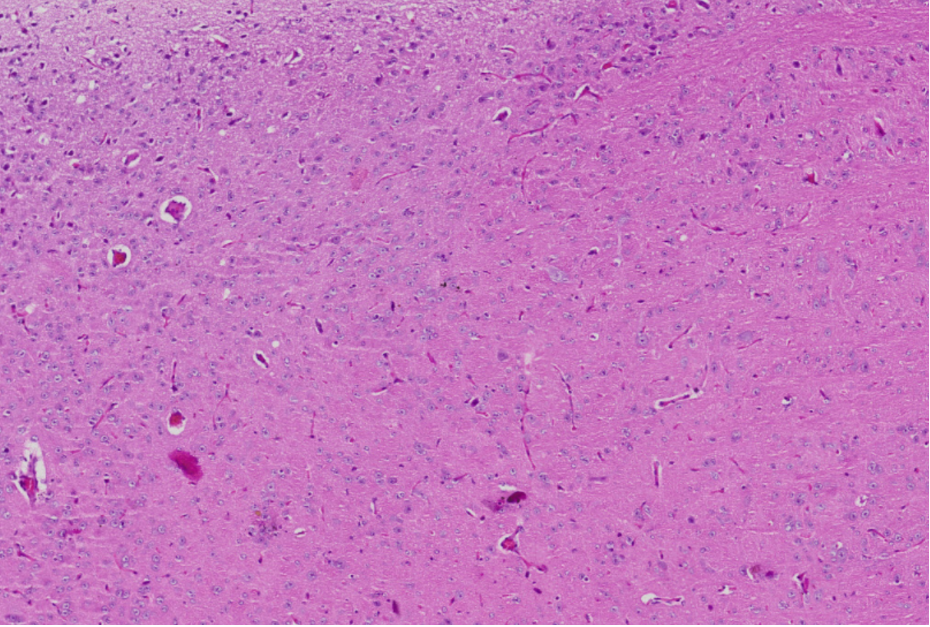 |
| Dose 100:1 | 1 | 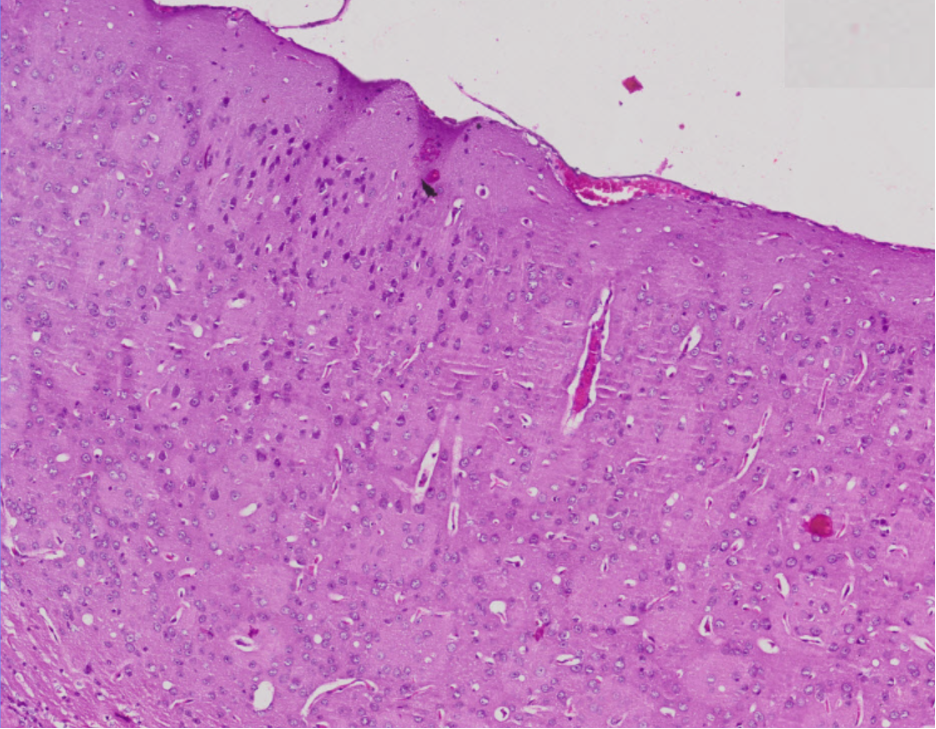 |
|  | 2 | 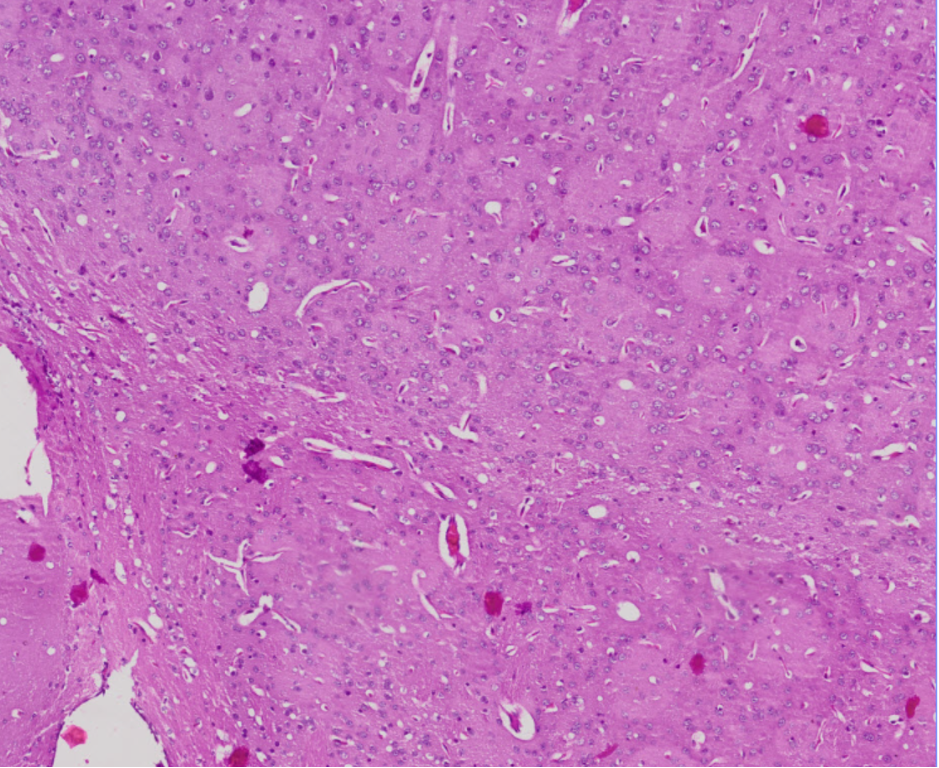 |
|  | 3 | 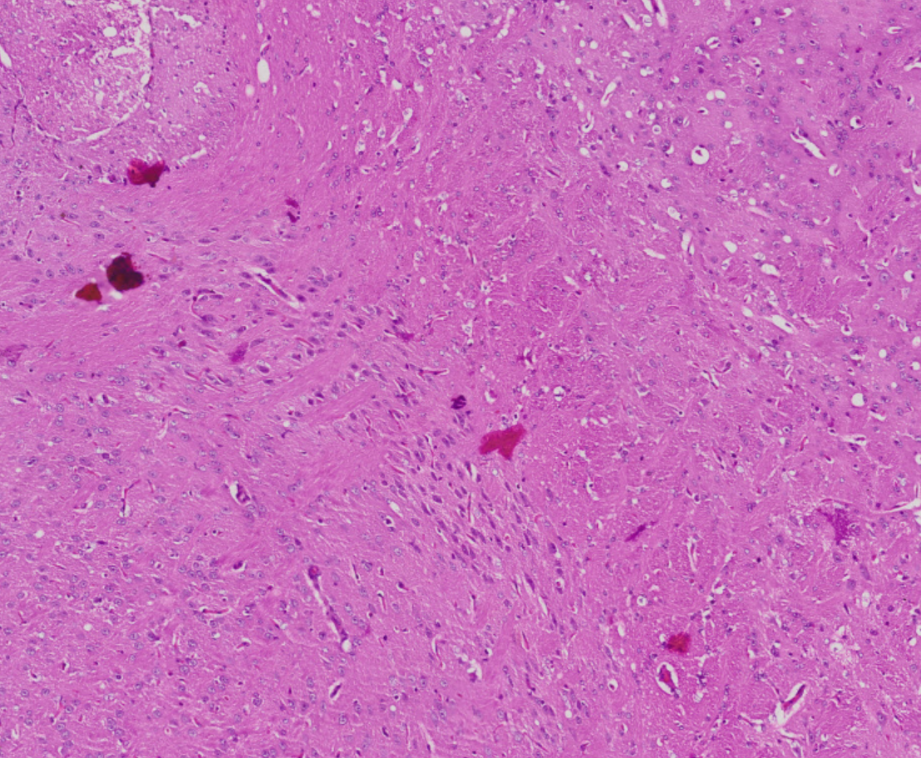 |
|  | 4 | 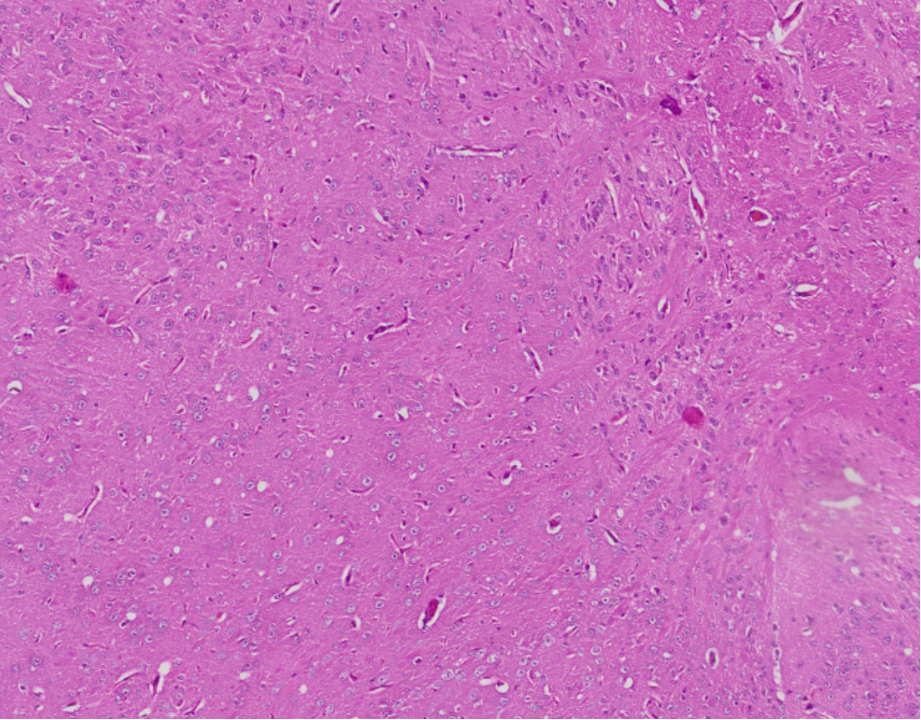 |
|  | 5 | 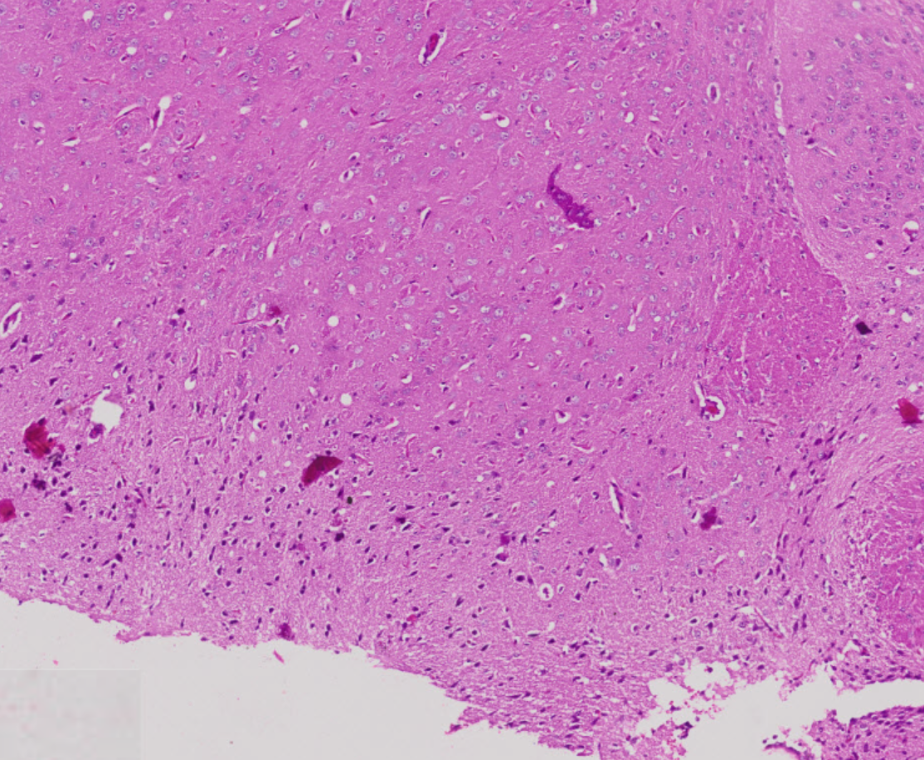 |

**Pre test post test**

| **Perlakuan** | | **U1** | | **U2** | | **U3** | | **U4** | | **U5** |  |
| --- | --- | --- | --- | --- | --- | --- | --- | --- | --- | --- | --- |
| **Kontrol** | *Pre-Test* | 8.44 | 6.15 | | 6.58 | | 7.15 | | 7.37 | |  |
| *Post-Test* | 7.56 | 8.53 | | 7.49 | | 6.19 | | 6.37 | |  |
| **Dosis 1:1** | *Pre-Test* | 10.56 | 8.34 | | 8.59 | | 7.1 | | 7.29 | |  |
| *Post-Test* | 8.34 | 7.23 | | 6.49 | | 6.32 | | 5.29 | |  |
| **Dosis 1:100** | *Pre-Test* | 7.51 | 8.34 | | 7.39 | | 7.45 | | 6.47 | |  |
| *Post Test* | 6.58 | 7.34 | | 6.59 | | 6.9 | | 5.92 | |  |
| **Dosis 100:1** | *Pre-Test* | 7.56 | 7.34 | | 7.79 | | 7.54 | | 7.29 | |  |
| *Post-Test* | 8.56 | 7.34 | | 6.39 | | 6.53 | | 5.42 | |  |

| **Sel** | | **Kontrol** | | **P1** | | **P2** | | **P3** | |
| --- | --- | --- | --- | --- | --- | --- | --- | --- | --- |
| **Sel Normal** | *Pre-Test* | 55 | 6.15 | | 6.58 | | 7.15 | |  |
| *Post-Test* | 62 | 8.53 | | 7.49 | | 6.19 | |  |
| **Dosis 1:1** | *Pre-Test* | 71 | 8.34 | | 8.59 | | 7.1 | |  |
| *Post-Test* | 62,67 | 7.23 | | 7.49 | | 6.32 | |  |
| **Dosis 1:100** | *Pre-Test* | 7.51 | 8.34 | | 7.39 | | 7.45 | |  |
| *Post Test* | 6.58 | 7.34 | | 7.59 | | 7.9 | |  |
| **Dosis 100:1** | *Pre-Test* | 7.56 | 7.34 | | 7.79 | | 7.54 | |  |
| *Post-Test* | 8.56 | 7.34 | | 6.39 | | 6.53 | |  |

1. No. Catalogue tiap bahan
   - 554655: BD Cytofix™ Fixation Buffer (BD Biosciences; [BD Cytofix™ Fixation BufferBD Bioscienceshttps://www.bdbiosciences.com › en-us › research-reagents](https://www.bdbiosciences.com/en-us/products/reagents/flow-cytometry-reagents/research-reagents/buffers-and-supporting-reagents-ruo/fixation-buffer.554655))
   - SAB4502982: Anti TNF-a Ab (Sigma Aldrich; <https://www.sigmaaldrich.com/ID/en/search/mfcd00162116?focus=products&page=1&perpage=30&sort=relevance&term=mfcd00162116&type=mdl_number>)
   - P4474: PBS 7.4 (Sigma Aldrich; <https://www.sigmaaldrich.com/ID/en/product/sigma/p4474>)
   - BK-802N DLS nano particle size analyser biobase

- PEG400 **Polyethylene glycol 400**

**Synonym(s):**

Poly(ethylene glycol), PEG

**Linear Formula:**

H(OCH2CH2)nOH

**CAS Number:**

[**25322-68-3**](https://www.sigmaaldrich.com/ID/en/search/25322-68-3?focus=products&page=1&perpage=30&sort=relevance&term=25322-68-3&type=cas_number)

1. Therapeutic Potential of Centella asiatica Nanoparticles in Mitigating Cognitive Decline and TNF-α Mediated Inflammation: An In Vivo Study in Mice

2. Centella asiatica in Nanoparticles as a Potential Neuroprotective Agent Against Cognitive Decline and TNF-α Inflammation: An In Vivo Investigation in Mice

3. Exploring the Neuroprotective Potential of Centella asiatica Nanoparticles: Effects on Cognitive Function and TNF-α Mediated Inflammation in a Mice Model
